# Supplementary material for: Brain states govern the spatio-temporal dynamics of resting-state functional connectivity
Source: eLife journal article supplement (doi:10.7554/elife.53186), 2020-06-22
Supplement: supp [file elife-53186-supp-v1.zip]

Archive with 3 entries (3 files):
- elife_poa_e53186_Transparent_Reporting_File.pdf
- elife_poa_e53186_Figure_1_figure_supplement_1.tif
- elife_poa_e53186_Figure_2_figure_supplement_1.tif
