# Supplementary figures and images for: Brain states govern the spatio-temporal dynamics of resting-state functional connectivity
Source: eLife journal article supplement (doi:10.7554/elife.53186), 2020-06-22

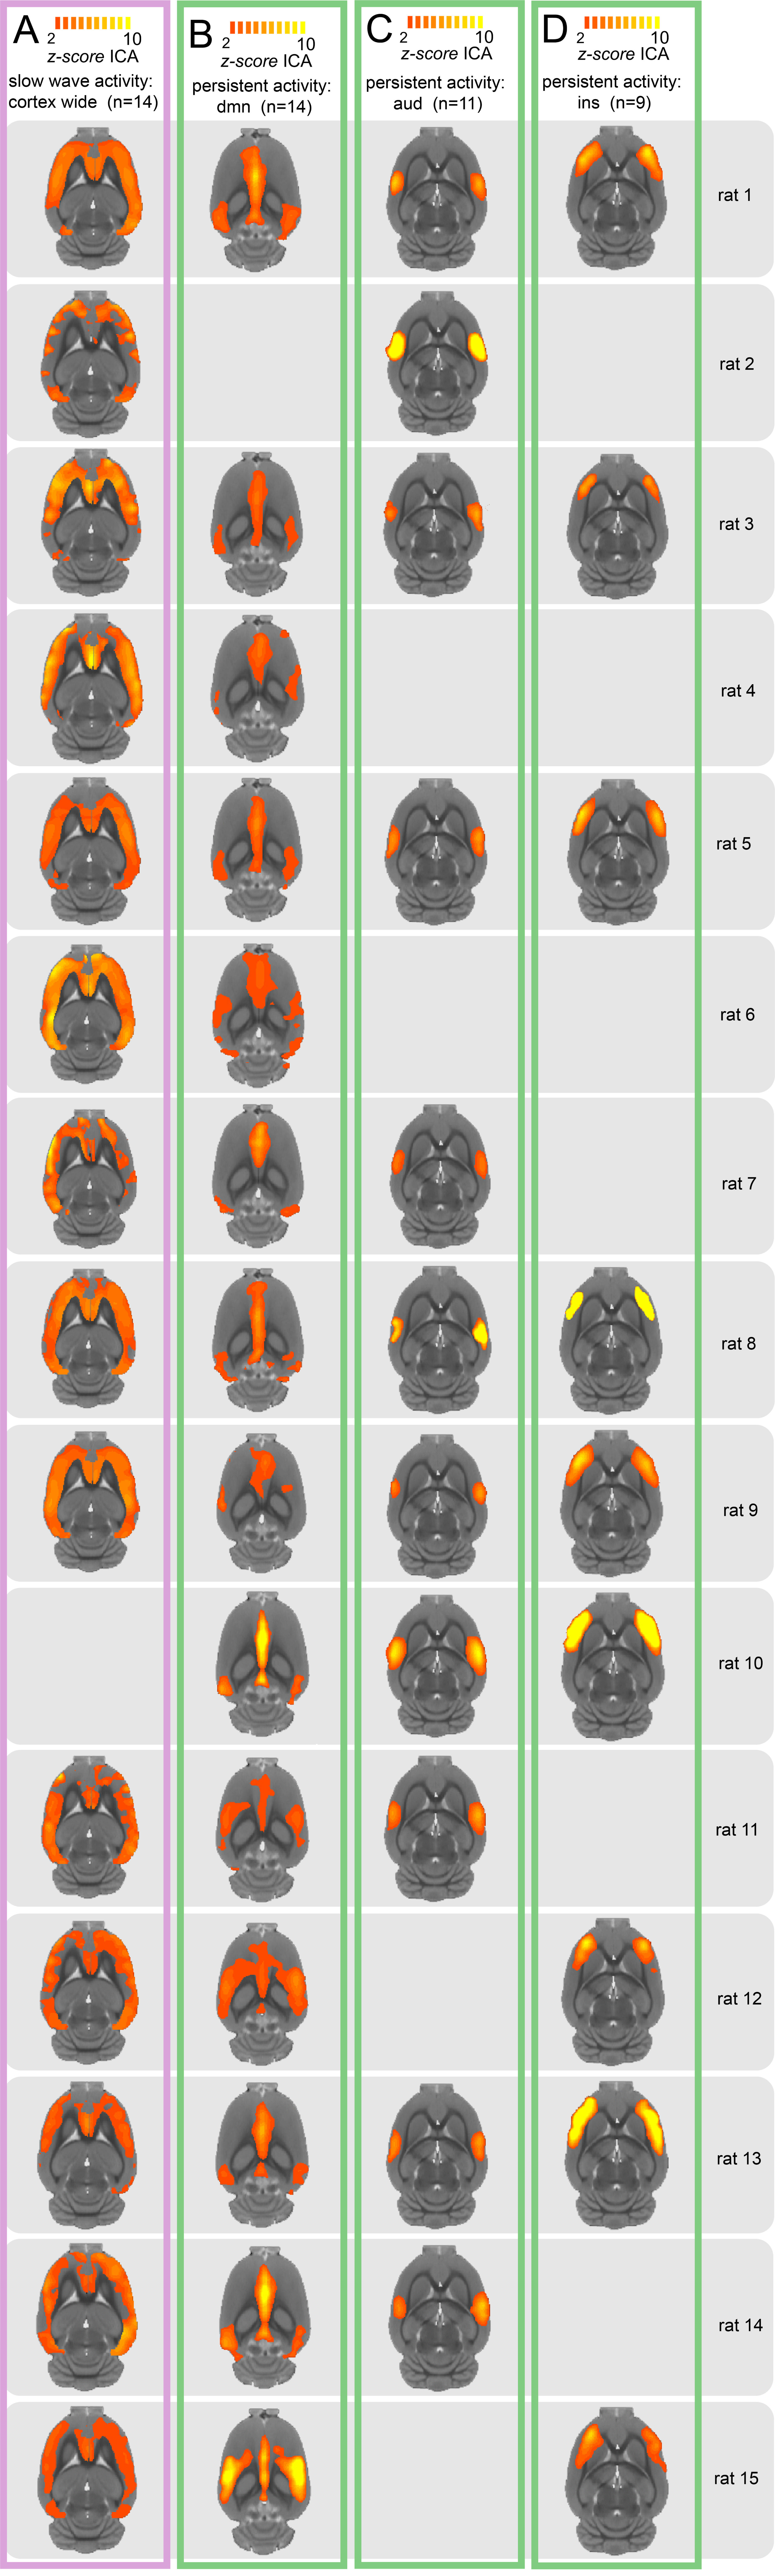

Supplement: supp [file elife-53186-supp-v1.zip › elife_poa_e53186_Figure_1_figure_supplement_1.tif]

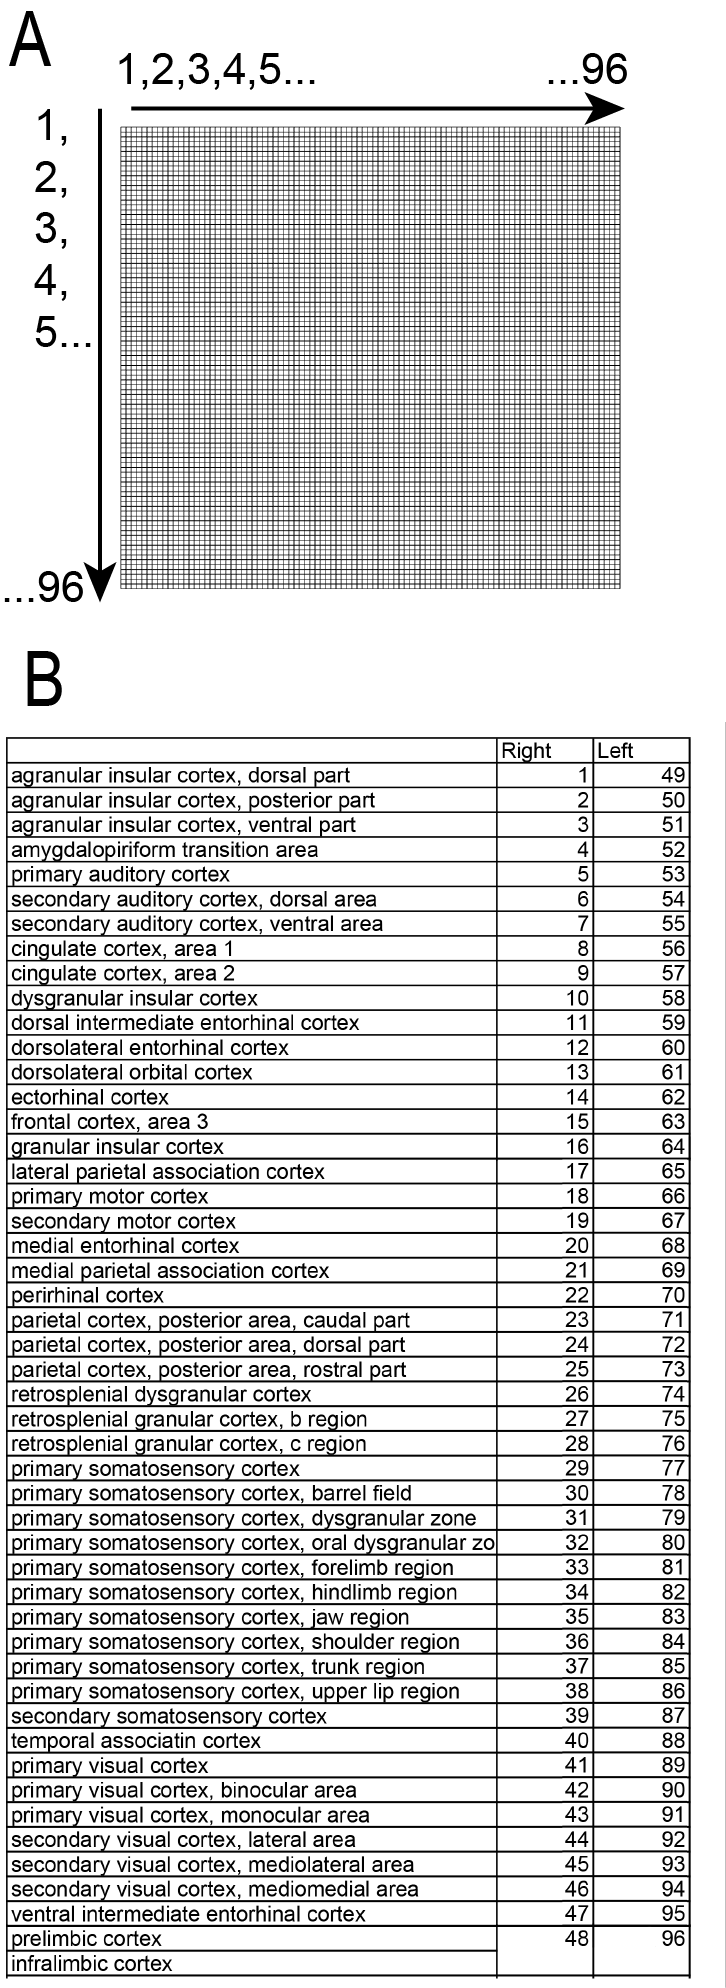

Supplement: supp [file elife-53186-supp-v1.zip › elife_poa_e53186_Figure_2_figure_supplement_1.tif]
